# Supplementary material for: Effect of Dairy Matrix on the Postprandial Blood Metabolome
Source: MDPI journal article supplement (doi:10.3390/nu13124280), 2021-11-27
Supplement: s1 [file s1]

**Table S1.** Mean concentrations of plasma amino acids. q-values indicate FDR-adjusted p-values from mixed effect models for meal-time interactions ( $q_{\text{meal-time}}$ ), meal effect ( $q_{\text{meal}}$ ) and time effect ( $q_{\text{time}}$ ). \* indicate  $q < 0.05$ . Letters indicate significant differences in post hoc tests at a given time point within each metabolite section.

| Time (min)  | 0     | 30                  | 60                 | 90                  | 120   | 180   | 240   | 300   | 360   | 420   | 480   | $q_{\text{meal-time}}$ | $q_{\text{meal}}$ | $q_{\text{time}}$ |
|-------------|-------|---------------------|--------------------|---------------------|-------|-------|-------|-------|-------|-------|-------|------------------------|-------------------|-------------------|
| Alanine     |       |                     |                    |                     |       |       |       |       |       |       |       |                        |                   |                   |
| Cheese      | 0.303 | 0.367               | 0.429              | 0.453               | 0.429 | 0.404 | 0.401 | 0.358 | 0.329 | 0.311 | 0.297 | <0.001*                | 0.992             | <0.001*           |
| Hom. Cheese | 0.322 | 0.386               | 0.439              | 0.470               | 0.454 | 0.437 | 0.398 | 0.354 | 0.333 | 0.314 | 0.296 |                        |                   |                   |
| MCI Drink   | 0.324 | 0.419               | 0.446              | 0.413               | 0.399 | 0.395 | 0.393 | 0.373 | 0.359 | 0.321 | 0.305 |                        |                   |                   |
| MCI Gel     | 0.319 | 0.388               | 0.426              | 0.428               | 0.394 | 0.375 | 0.358 | 0.330 | 0.293 | 0.283 | 0.290 |                        |                   |                   |
| Glutamine   |       |                     |                    |                     |       |       |       |       |       |       |       |                        |                   |                   |
| Cheese      | 0.741 | 0.822               | 0.868              | 0.857               | 0.779 | 0.821 | 0.833 | 0.822 | 0.836 | 0.799 | 0.806 | 0.588                  | 0.992             | <0.001*           |
| Hom. Cheese | 0.733 | 0.821               | 0.886              | 0.870               | 0.780 | 0.850 | 0.816 | 0.802 | 0.816 | 0.809 | 0.781 |                        |                   |                   |
| MCI Drink   | 0.724 | 0.876               | 0.873              | 0.834               | 0.703 | 0.819 | 0.831 | 0.838 | 0.826 | 0.822 | 0.814 |                        |                   |                   |
| MCI Gel     | 0.679 | 0.829               | 0.883              | 0.840               | 0.734 | 0.823 | 0.826 | 0.825 | 0.807 | 0.794 | 0.791 |                        |                   |                   |
| Glycine     |       |                     |                    |                     |       |       |       |       |       |       |       |                        |                   |                   |
| Cheese      | 0.251 | 0.272               | 0.275              | 0.264               | 0.265 | 0.247 | 0.238 | 0.221 | 0.227 | 0.217 | 0.221 | 0.328                  | 0.992             | <0.001*           |
| Hom. Cheese | 0.252 | 0.270               | 0.275              | 0.269               | 0.270 | 0.252 | 0.230 | 0.225 | 0.227 | 0.226 | 0.209 |                        |                   |                   |
| MCI Drink   | 0.246 | 0.283               | 0.276              | 0.248               | 0.254 | 0.243 | 0.247 | 0.237 | 0.231 | 0.225 | 0.231 |                        |                   |                   |
| MCI Gel     | 0.230 | 0.267               | 0.267              | 0.249               | 0.252 | 0.222 | 0.229 | 0.215 | 0.208 | 0.209 | 0.207 |                        |                   |                   |
| Histidine   |       |                     |                    |                     |       |       |       |       |       |       |       |                        |                   |                   |
| Cheese      | 0.079 | 0.092               | 0.097              | 0.094               | 0.099 | 0.092 | 0.095 | 0.092 | 0.092 | 0.084 | 0.086 | 0.185                  | 0.992             | <0.001*           |
| Hom. Cheese | 0.072 | 0.088               | 0.101              | 0.099               | 0.097 | 0.097 | 0.094 | 0.088 | 0.086 | 0.089 | 0.079 |                        |                   |                   |
| MCI Drink   | 0.076 | 0.099               | 0.100              | 0.092               | 0.108 | 0.089 | 0.088 | 0.087 | 0.085 | 0.082 | 0.080 |                        |                   |                   |
| MCI Gel     | 0.072 | 0.093               | 0.098              | 0.097               | 0.095 | 0.092 | 0.092 | 0.088 | 0.088 | 0.083 | 0.076 |                        |                   |                   |
| Leucine     |       |                     |                    |                     |       |       |       |       |       |       |       |                        |                   |                   |
| Cheese      | 0.109 | 0.164 <sup>a</sup>  | 0.199              | 0.208               | 0.191 | 0.184 | 0.177 | 0.158 | 0.158 | 0.143 | 0.143 | 0.001*                 | 0.992             | <0.001*           |
| Hom. Cheese | 0.108 | 0.155 <sup>a</sup>  | 0.188              | 0.203               | 0.205 | 0.204 | 0.190 | 0.161 | 0.146 | 0.133 | 0.133 |                        |                   |                   |
| MCI Drink   | 0.099 | 0.207 <sup>b</sup>  | 0.212              | 0.199               | 0.193 | 0.180 | 0.158 | 0.152 | 0.145 | 0.132 | 0.131 |                        |                   |                   |
| MCI Gel     | 0.096 | 0.192 <sup>ab</sup> | 0.201              | 0.206               | 0.210 | 0.197 | 0.175 | 0.155 | 0.143 | 0.130 | 0.118 |                        |                   |                   |
| Isoleucine  |       |                     |                    |                     |       |       |       |       |       |       |       |                        |                   |                   |
| Cheese      | 0.050 | 0.087 <sup>a</sup>  | 0.102 <sup>a</sup> | 0.096 <sup>a</sup>  | 0.095 | 0.092 | 0.088 | 0.080 | 0.078 | 0.070 | 0.063 | <0.001*                | 0.041*            | <0.001*           |
| Hom. Cheese | 0.054 | 0.087 <sup>a</sup>  | 0.101 <sup>a</sup> | 0.110 <sup>ab</sup> | 0.116 | 0.104 | 0.095 | 0.088 | 0.067 | 0.059 | 0.056 |                        |                   |                   |

|                      |       |                     |                     |                     |       |                     |                     |                     |                     |                     |                     |         |        |         |
|----------------------|-------|---------------------|---------------------|---------------------|-------|---------------------|---------------------|---------------------|---------------------|---------------------|---------------------|---------|--------|---------|
| MCI Drink            | 0.054 | 0.126 <sup>b</sup>  | 0.129 <sup>b</sup>  | 0.118 <sup>b</sup>  | 0.114 | 0.098               | 0.085               | 0.092               | 0.076               | 0.071               | 0.062               |         |        |         |
| MCI Gel              | 0.052 | 0.108 <sup>ab</sup> | 0.118 <sup>ab</sup> | 0.116 <sup>ab</sup> | 0.121 | 0.110               | 0.101               | 0.093               | 0.083               | 0.067               | 0.059               |         |        |         |
| <b>Methionine</b>    |       |                     |                     |                     |       |                     |                     |                     |                     |                     |                     |         |        |         |
| Cheese               | 0.070 | 0.092 <sup>a</sup>  | 0.106               | 0.111               | 0.080 | 0.097 <sup>ab</sup> | 0.094               | 0.087               | 0.078               | 0.069               | 0.074               |         |        |         |
| Hom. Cheese          | 0.068 | 0.092 <sup>a</sup>  | 0.105               | 0.107               | 0.074 | 0.107 <sup>a</sup>  | 0.100               | 0.089               | 0.084               | 0.072               | 0.067               |         |        |         |
| MCI Drink            | 0.066 | 0.117 <sup>b</sup>  | 0.116               | 0.108               | 0.081 | 0.101 <sup>ab</sup> | 0.091               | 0.093               | 0.087               | 0.077               | 0.075               | 0.588   | 0.041* | <0.001* |
| MCI Gel              | 0.055 | 0.092 <sup>a</sup>  | 0.109               | 0.100               | 0.068 | 0.090 <sup>b</sup>  | 0.086               | 0.076               | 0.068               | 0.057               | 0.066               |         |        |         |
| <b>Phenylalanine</b> |       |                     |                     |                     |       |                     |                     |                     |                     |                     |                     |         |        |         |
| Cheese               | 0.035 | 0.052               | 0.057               | 0.060               | 0.062 | 0.055               | 0.051               | 0.043               | 0.042 <sup>a</sup>  | 0.041 <sup>a</sup>  | 0.034 <sup>a</sup>  |         |        |         |
| Hom. Cheese          | 0.034 | 0.052               | 0.057               | 0.060               | 0.069 | 0.059               | 0.055               | 0.041               | 0.038 <sup>a</sup>  | 0.032 <sup>ab</sup> | 0.023 <sup>ab</sup> |         |        |         |
| MCI Drink            | 0.037 | 0.061               | 0.056               | 0.059               | 0.058 | 0.052               | 0.049               | 0.043               | 0.035 <sup>ab</sup> | 0.031 <sup>ab</sup> | 0.026 <sup>ab</sup> | 0.050   | 0.041* | <0.001* |
| MCI Gel              | 0.029 | 0.053               | 0.056               | 0.055               | 0.054 | 0.054               | 0.047               | 0.040               | 0.020 <sup>b</sup>  | 0.028 <sup>b</sup>  | 0.017 <sup>b</sup>  |         |        |         |
| <b>Tyrosine</b>      |       |                     |                     |                     |       |                     |                     |                     |                     |                     |                     |         |        |         |
| Cheese               | 0.044 | 0.067 <sup>a</sup>  | 0.081               | 0.090               | 0.089 | 0.086               | 0.083 <sup>ab</sup> | 0.077 <sup>ab</sup> | 0.072 <sup>a</sup>  | 0.070 <sup>a</sup>  | 0.058 <sup>a</sup>  |         |        |         |
| Hom. Cheese          | 0.044 | 0.066 <sup>a</sup>  | 0.081               | 0.089               | 0.097 | 0.095               | 0.092 <sup>a</sup>  | 0.079 <sup>a</sup>  | 0.072 <sup>a</sup>  | 0.063 <sup>ab</sup> | 0.056 <sup>a</sup>  | <0.001* | 0.992  | <0.001* |
| MCI Drink            | 0.044 | 0.084 <sup>b</sup>  | 0.086               | 0.092               | 0.083 | 0.083               | 0.077 <sup>b</sup>  | 0.071 <sup>ab</sup> | 0.065 <sup>ab</sup> | 0.059 <sup>b</sup>  | 0.054 <sup>ab</sup> |         |        |         |
| MCI Gel              | 0.044 | 0.076 <sup>ab</sup> | 0.089               | 0.091               | 0.090 | 0.088               | 0.078 <sup>ab</sup> | 0.068 <sup>b</sup>  | 0.057 <sup>b</sup>  | 0.055 <sup>b</sup>  | 0.047 <sup>b</sup>  |         |        |         |
| <b>Valine</b>        |       |                     |                     |                     |       |                     |                     |                     |                     |                     |                     |         |        |         |
| Cheese               | 0.243 | 0.305 <sup>a</sup>  | 0.344               | 0.370               | 0.351 | 0.355 <sup>a</sup>  | 0.358               | 0.343               | 0.344               | 0.320               | 0.308               |         |        |         |
| Hom. Cheese          | 0.259 | 0.315 <sup>a</sup>  | 0.356               | 0.382               | 0.375 | 0.396 <sup>b</sup>  | 0.376               | 0.360               | 0.345               | 0.318               | 0.304               | <0.001* | 0.992  | <0.001* |
| MCI Drink            | 0.251 | 0.366 <sup>b</sup>  | 0.370               | 0.371               | 0.387 | 0.354 <sup>ab</sup> | 0.340               | 0.329               | 0.324               | 0.294               | 0.303               |         |        |         |
| MCI Gel              | 0.236 | 0.339 <sup>ab</sup> | 0.368               | 0.374               | 0.389 | 0.391 <sup>ab</sup> | 0.357               | 0.342               | 0.326               | 0.303               | 0.280               |         |        |         |
| <b>Total BCAA</b>    |       |                     |                     |                     |       |                     |                     |                     |                     |                     |                     |         |        |         |
| Cheese               | 0.402 | 0.556 <sup>a</sup>  | 0.645               | 0.674               | 0.638 | 0.630 <sup>a</sup>  | 0.623               | 0.581               | 0.580               | 0.533               | 0.514               |         |        |         |
| Hom. Cheese          | 0.422 | 0.557 <sup>a</sup>  | 0.645               | 0.695               | 0.696 | 0.704 <sup>b</sup>  | 0.661               | 0.609               | 0.558               | 0.509               | 0.493               | <0.001* | 0.992  | <0.001* |
| MCI Drink            | 0.404 | 0.700 <sup>b</sup>  | 0.710               | 0.688               | 0.694 | 0.632 <sup>ab</sup> | 0.583               | 0.574               | 0.545               | 0.497               | 0.496               |         |        |         |
| MCI Gel              | 0.385 | 0.639 <sup>ab</sup> | 0.687               | 0.696               | 0.720 | 0.698 <sup>ab</sup> | 0.634               | 0.590               | 0.552               | 0.500               | 0.457               |         |        |         |
